# Supplementary material
Source: PubMed Central journal article supplement (PMC373271)
Supplement: nar_32_1_287__1.pdf [file nar_32_1_287__1.pdf]

```

1646                                     AAA AAC TTA AAA AGA TTA ATT TTA TTA TTT AAT AGA
1682 ATG CAA CAG AAA CAA GTA AAT GTT ATT GAA TTT TTT AGT GGA ATT GGT GGA TTA CGT TCA AGT TAT GAA CGA TCT
  1 M  Q  Q  K  Q  V  N  V  I  E  F  F  S  G  I  G  G  L  R  S  S  Y  E  R  S
1757 TCA ATT AAT ATA AAT GCA ACA TTT ATA CCA TTT GAT ATA Agtttgaagataatataataaaaaggaatatcaaaataaatattcaca
 26 S  I  N  I  N  A  T  F  I  P  F  D  I  N
1843 ataattatag  AT GAA ATT GCA AAT AAA ATA TAC TCA AAG AAT TTT AAA GAA GAA GTA CAA GTAgtttgtaatgattata
 40      E  I  A  N  K  I  Y  S  K  N  F  K  E  E  V  Q  V
1922 tttattaaanaagagtaataacataataaattatattttaaatagAAA AAT TTA GAT AGC ATT TCA ATA AAA CAA ATA GAA TCT TTA
 57      K  N  L  D  S  I  S  I  K  Q  I  E  S  L
2008 AAT TGT AAT ACA TGG TTT ATG AGT CCA CCT TGT CAA CCA TAT AAT AAT TCA ATA ATG TCT AAA CAT AAA GAT ATT
 71 N  C  N  T  W  F  M  S  P  P  C  Q  P  Y  N  N  S  I  M  S  K  H  K  D  I
2083 AAT GAT CCA AGA GCA AAA AGT GTA TTA CAT TTA TAT CGT GAT ATT CTT CCA TAT TTA ATA AAT AAA CCA AAA CAT
 96 N  D  P  R  A  K  S  V  L  H  L  Y  R  D  I  L  P  Y  L  I  N  K  P  K  H
2158 ATT TTT ATT GAA AAT GTT CCA TTA TTT AAA GAA TCA CTT GTT TTT AAA GAA ATT TAT AAT ATT CTT ATT AAA AAT
121 I  F  I  E  N  V  P  L  F  K  E  S  L  V  F  K  E  I  Y  N  I  L  I  K  N
2233 CAA TAT TAT ATT AAA GAC ATT ATT TGT TCT CCT ATT GAT ATT GGA ATT CCA AAT AGT AGA ACT CGT TAT TAT GTT
146 Q  Y  Y  I  K  D  I  I  C  S  P  I  D  I  G  I  P  N  S  R  T  R  Y  Y  V
2308 ATG GCA AGA TTA ACT CCT TTT AAA AAT GAA ATT CAA TTA CAT CAA GAA AAA GAG TCA ATG ATA TCA AAT TAT TTA
171 M  A  R  L  T  P  F  K  N  E  I  Q  L  H  Q  E  K  E  S  M  I  S  N  Y  L
2383 GAT AAT AAT GTA AAT GAG TCT TAT TCT ATT CCT TCA GAT TTA ATT TTA AAG AAA GGA ATG TTA TTT GgtttgTTTT
196 D  N  N  V  N  E  S  Y  S  I  P  S  D  L  I  L  K  K  G  M  L  F  D
2460 taatatattttaaataaaaacattgaaaatggatttaattgaaaag AT  ATT GTT GGT AAA GAT GAT AAA AGG ACT TGT TGT TTT
219      I  V  G  K  D  D  K  R  T  C  C  F
2544 ACT AAG TCA TAT ACT AAA ATT GTT GAA GGA ACT GGT TCT ATT TAT TGT CCA ATA GAA CCT CAT TTT ATT CCA GTA
231 T  K      S  Y  T  K  I  V  E  G  T  G  S  I  Y  C  P  I  E  P  H  F  I  P  V
2619 AAA AAG GCT GAA GAT TTA CTT ATA AAA ATT TAA GAT ATT TTA CTC CAA ATG AAA ATA AAA AAA ATT CAC GGA TTT
256 K  K  A  E  D  L  L  N  K  N  L  R  Y  F  T  P  N  E  I  K  K  I  H  G  F
2694 TCT TCT AAT TTT ACA ACT CAA ATT GAT GGA TTA ACT GAT AAA CAA CAA TAT CAA TGT CTT GGT AAT AGC GTC TCT
281 S  S  N  F  T  T  Q  I  D  G  L  T  D  K  Q  Q  Y  Q  C  L  G  N  S  V  S
2769 TGC TTT GTT ATA GCA CAA TTA ATG GAA TAT TTA TTC GAT GAC TTA AAA GAA TAA ATT ATT ATT TAT TTC AAC TTT
306 C  F  V  I  A  Q  L  M  E  Y  L  F  D  D  L  K  E  *
2844 TGA ATT GAA TTA ATT TAT TTT TCA AGT TAA ATT GAA AAT TGT TTG TTT CAT TTT GGA TAT ACC AAA TAA AAA TAA

```

**Supplementary Material Figure 1.** Nucleotide and deduced amino acid sequences of *Ehmeth*. The nucleotides that make up the introns are in lowercase letters. The DNA sequence encoding *Ehmeth* is included in the contigs (TIGR 316636 read in anti-parallel). The DNA polyadenylation starting site deduced from the analysis of *Ehmeth* cDNA is underlined (from nucleotide 2871).

```

Ehmeth      MQQKQVNVIEFFSGIGGLCSSYERSSININATFIPFDINEIANKIYSKNF-KEEVQVKNL 59
Dnmt2      --MEPLRVLELYSGVGMHHALRESCIPA-QVVAIDVNTVANEVKYNFPHTQLLAKTI 57
           : : . * : : : * : * : * : : . : . * . * . . . : * : * : * : * . * * : : : . * . :

Ehmeth      DSISIKQIESLNCNTWFMSPPCQPYNNNSIMSKHKDINDPRAKSVLHLYRDILPYLINKPK 119
Dnmt2      EGITLEEFDRLSFDMILMSPPCQPFTR--IGRQGDMTDSRTNSFLHIL-DILPRLQKLPK 114
           : . * : : : : : * . : : * * * * * : : . : : * : . * . * : : * . * * : * * * * * : * *

Ehmeth      HIFIENVPLFKESLVFKEIYNILIKNQYIYKDIICSPIDIGIPNSRTRYVMARLT---- 175
Dnmt2      YILLENVKGFVSSSTRDLLIQTIENTCGFQYQEFILSPTSLGIPNSRLRYFLIAKLQSEPL 174
           : * : : * * * : * . . : : : : : : : : * * * . : * * * * * * * : * : * : *

Ehmeth      PFKN----- 179
Dnmt2      PFQAPGQVLMEFPKIESVHPQKYAMDVENKIQEKNVEPNISFDGSIQCSGKDAILFKLET 234
           ** :

Ehmeth      --EIQLHQEKES-----MISNYLDNNVN-ESYSIPSDLILKKGMLFDIVGKDDKRTCCFT 231
Dnmt2      AEEIHRKNQQDSDLVKMLKDFLEDDTDVNYLLPPKSLRLRYALLLDIVQPTCRRSVCFT 294
           ** : : : : * * : : : : : : : : * * : . : * * * * * : * : * *

Ehmeth      KSYTKIVEGTGSIYCPHPHFIP-----VKKAEDLLKNLRYFTPNEIKKIHF 280
Dnmt2      KGYSYIEGTGVLQTAEDVQVENIYKSLTNLSQEEQITKLLILKLRYPKEIANLLGF 354
           * . * . : * * * * * : . * : : : : . * * : * * * * * * * : : * *

Ehmeth      SSNFTTQIDGLTDKQQYQCLGNSVSCFVIAQLMEYLFDDLKE 322
Dnmt2      PPEFG-FPEKITVKQRYRLLGNSLVHVVAKLIKILYE---- 391
           . : * : : * * * : * * * : * : * : * : * : * :

```

**Supplementary Material Figure 2.** Clustal W alignment (35) of Ehmeht and human Dnmt2 (accession no. AAC39764). Amino acids in the putative *S*-adenosyl methionine binding domain (from amino acid 5 to 22), the putative catalytic site (from amino acid 72 to 92), and the PROSITE signature to cytosine-specific DNA methyltransferases C-terminal (PS00095) (from amino acid 298 to 316) are in italics.
